# Supplementary figures and images for: Trace element–protein interactions in endolymph from the inner ear of fish: implications for environmental reconstructions using fish otolith chemistry
Source: Royal Society of Chemistry journal article supplement (doi:10.1039/c6mt00189k), 2016-12-19

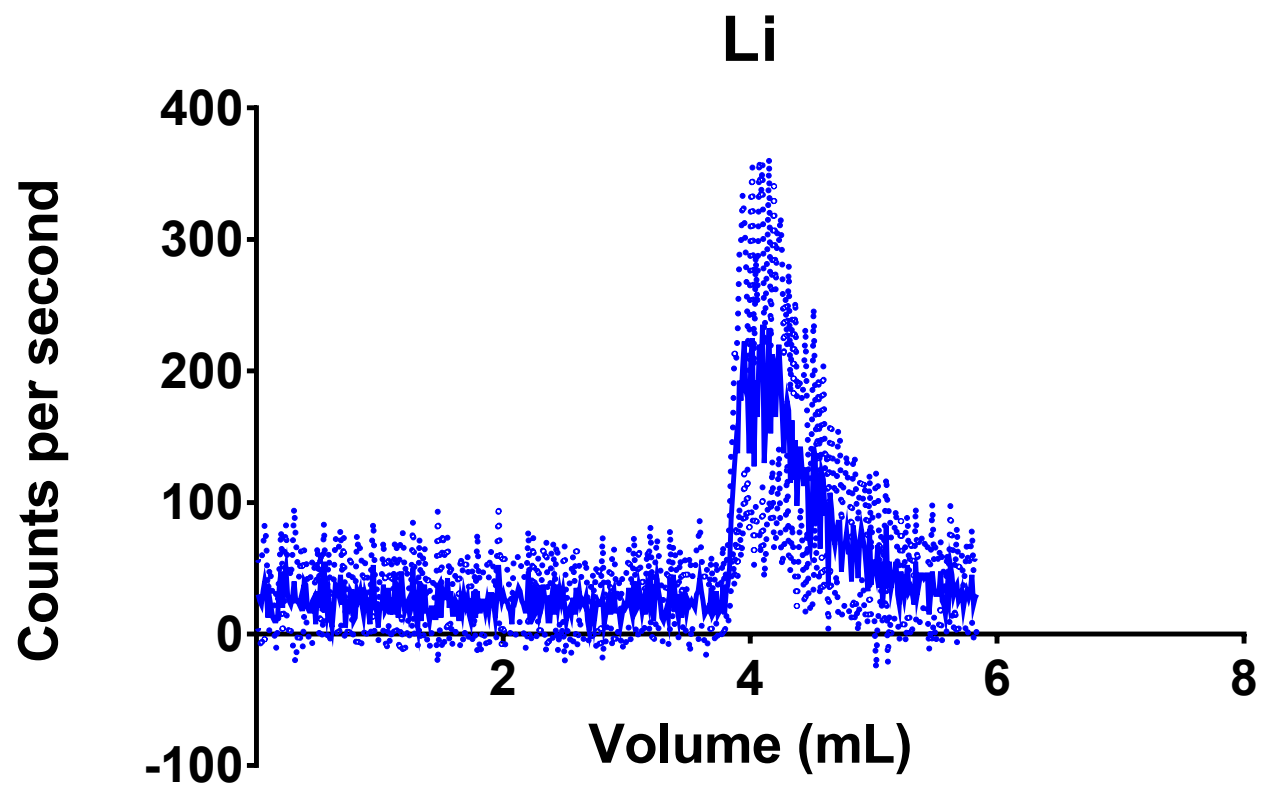

**B**

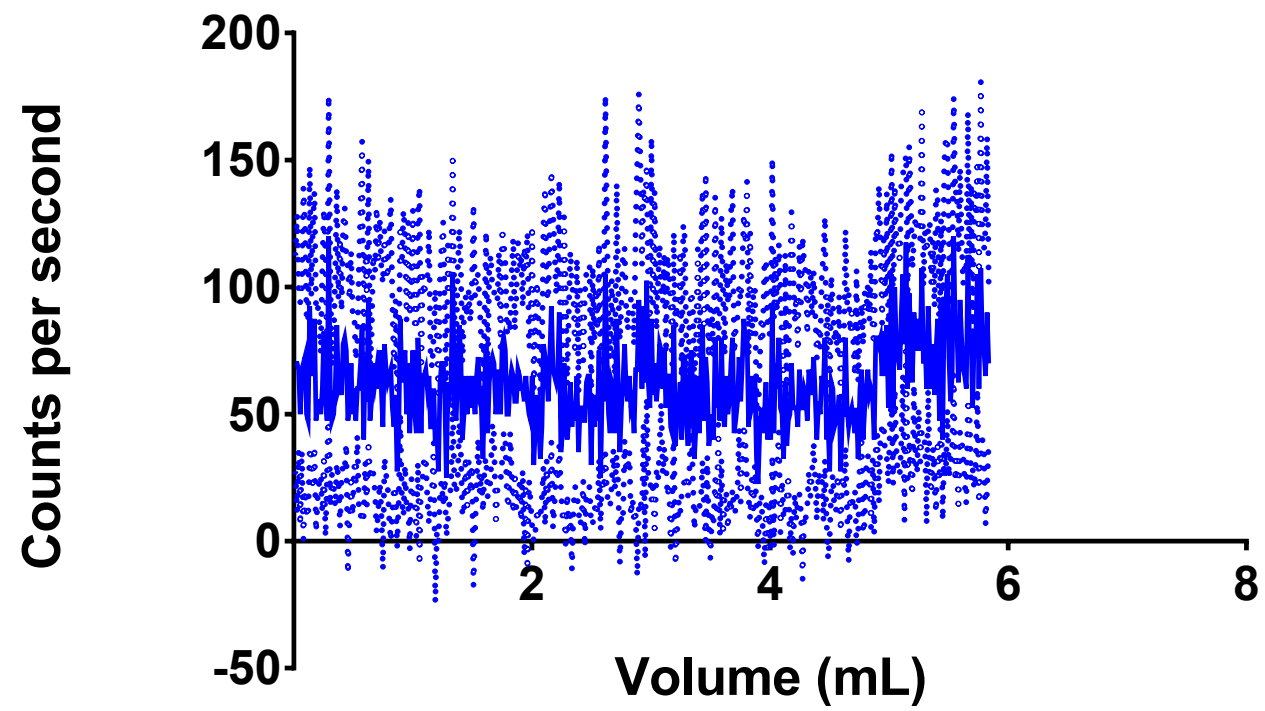

**Mg**

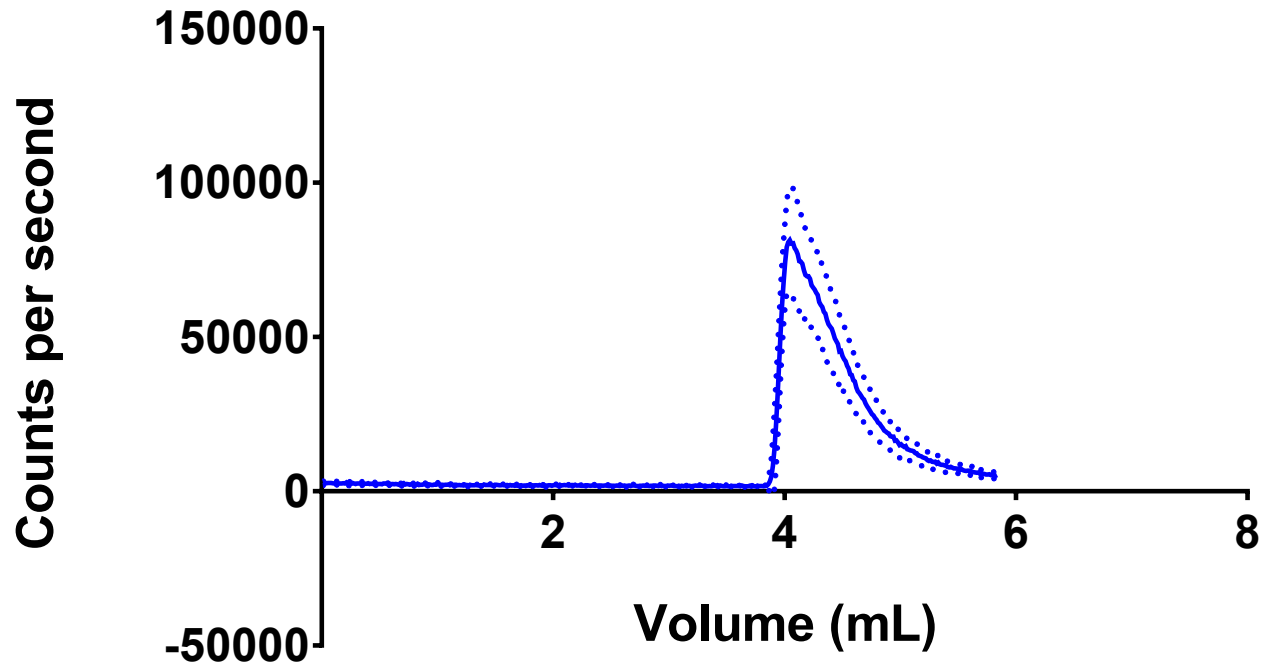

**P**

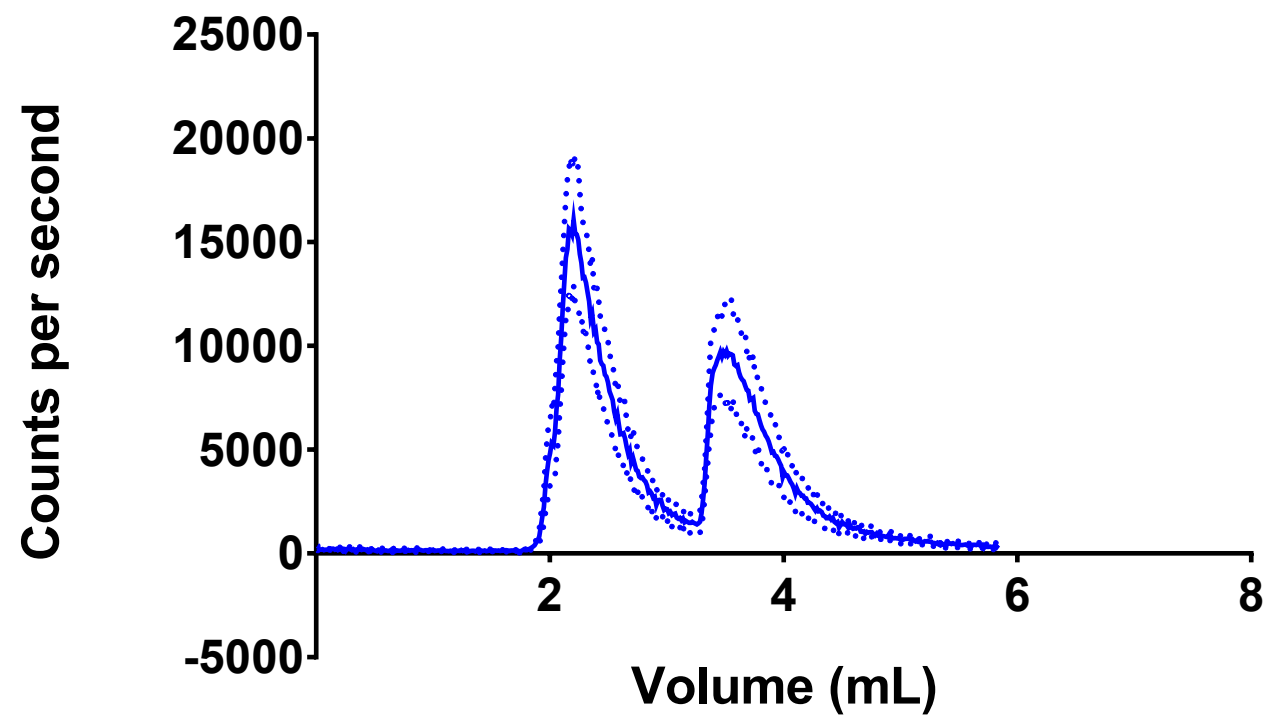

**K**

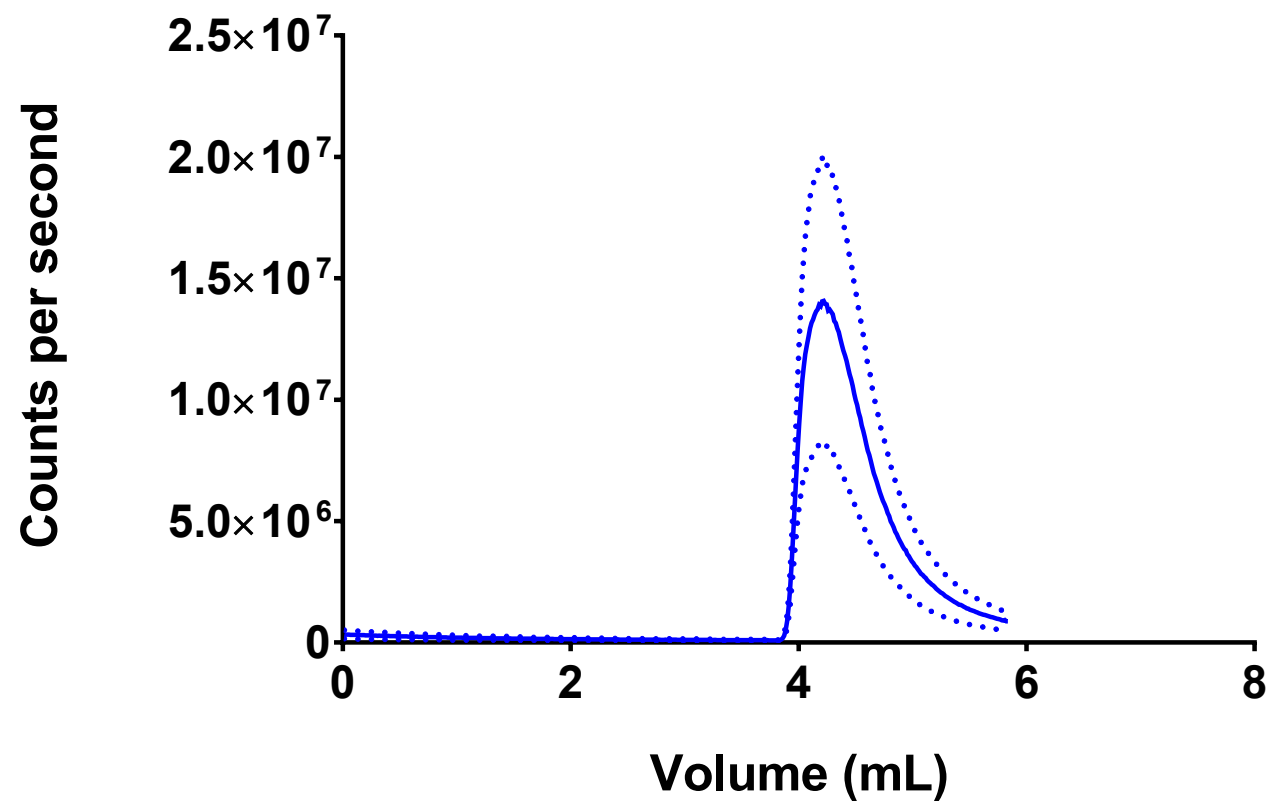

**Ca**

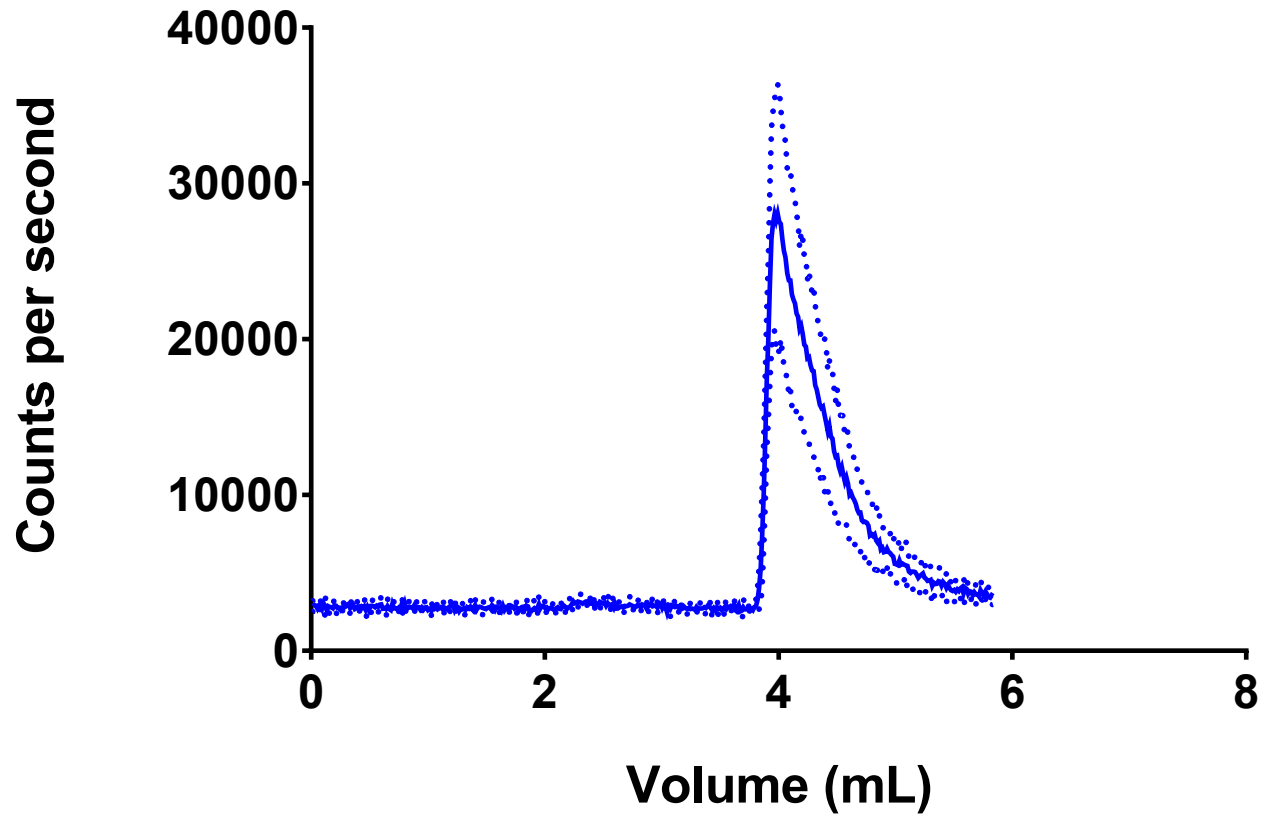

**V**

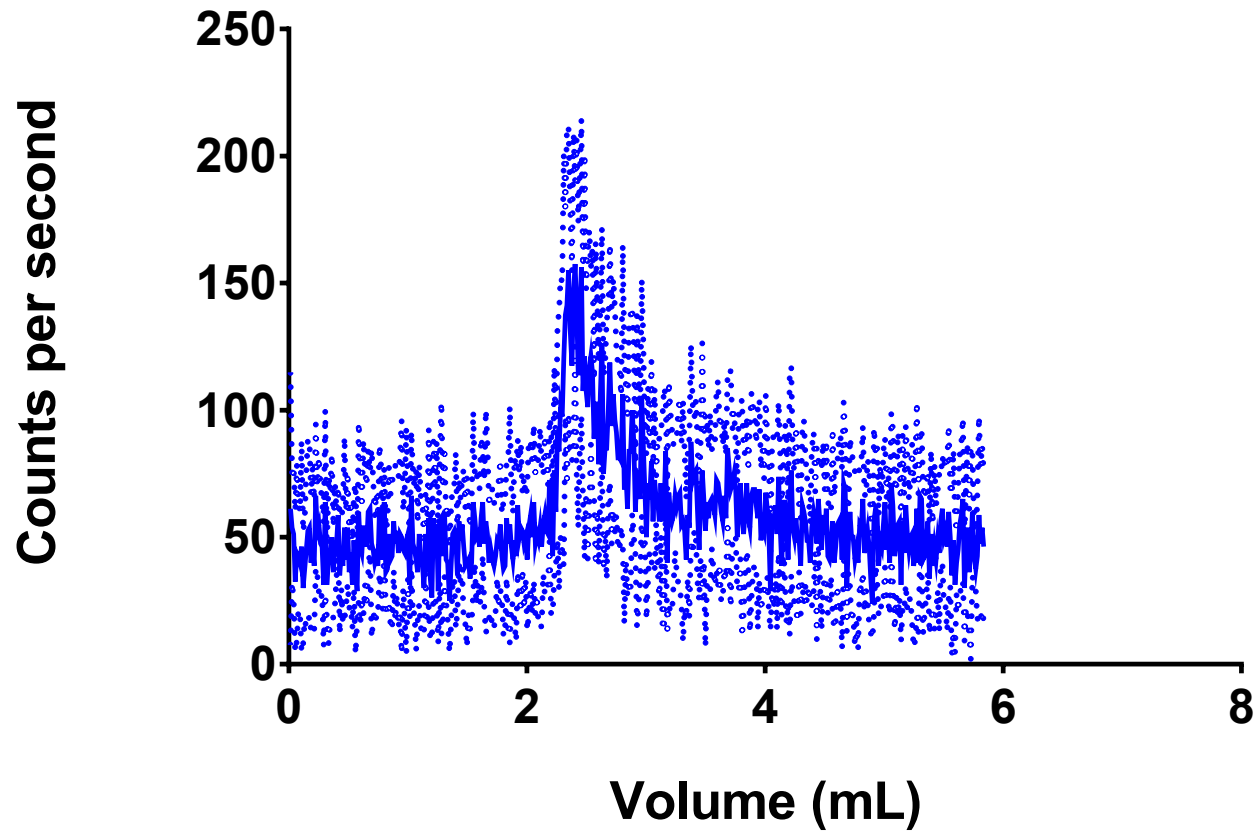

**Cr**

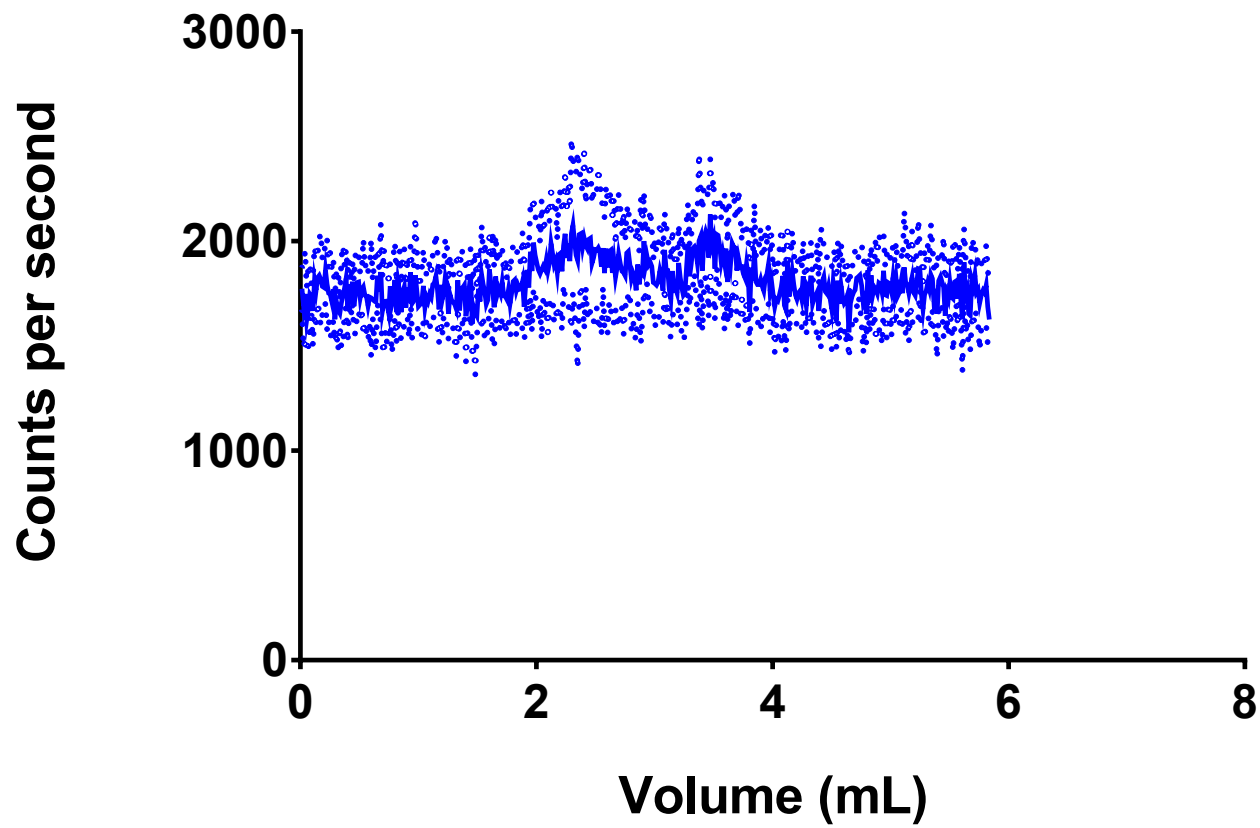



**Mn**

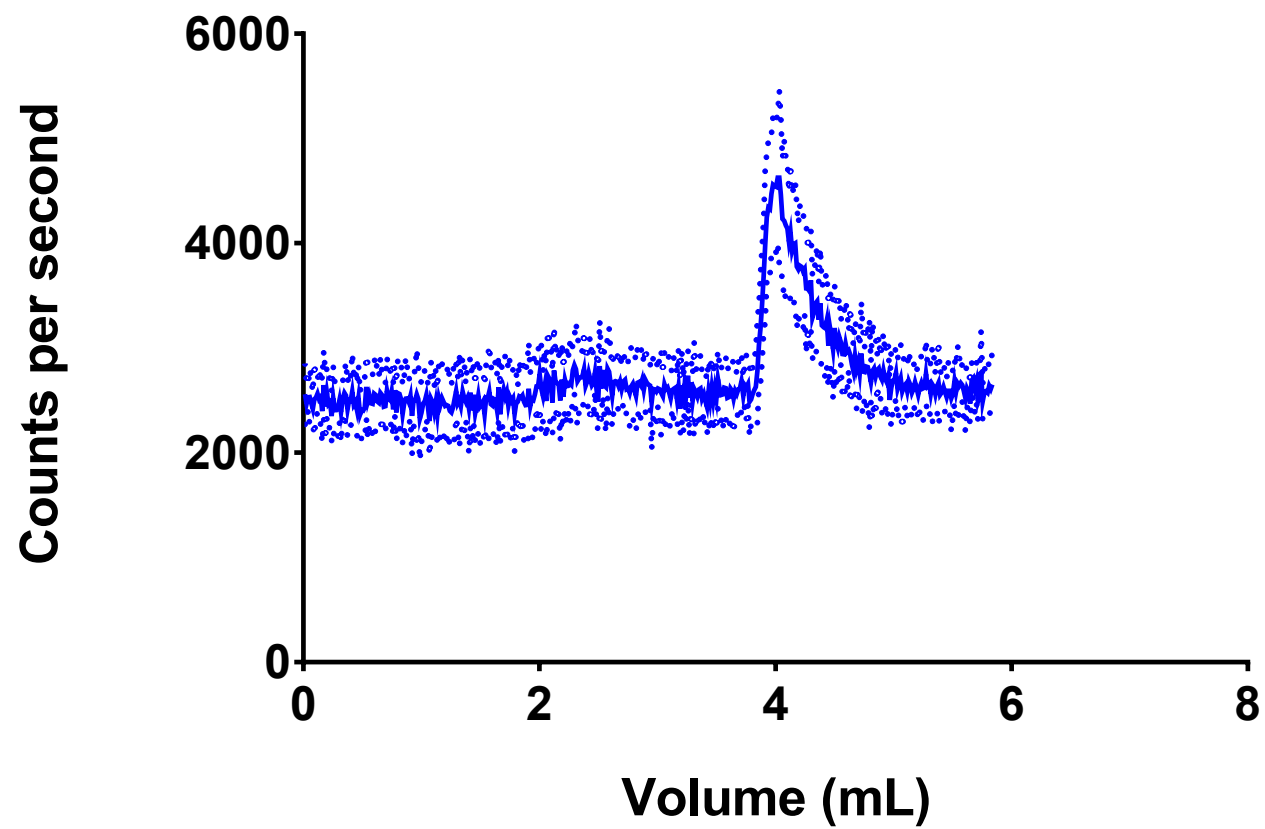

**Fe**

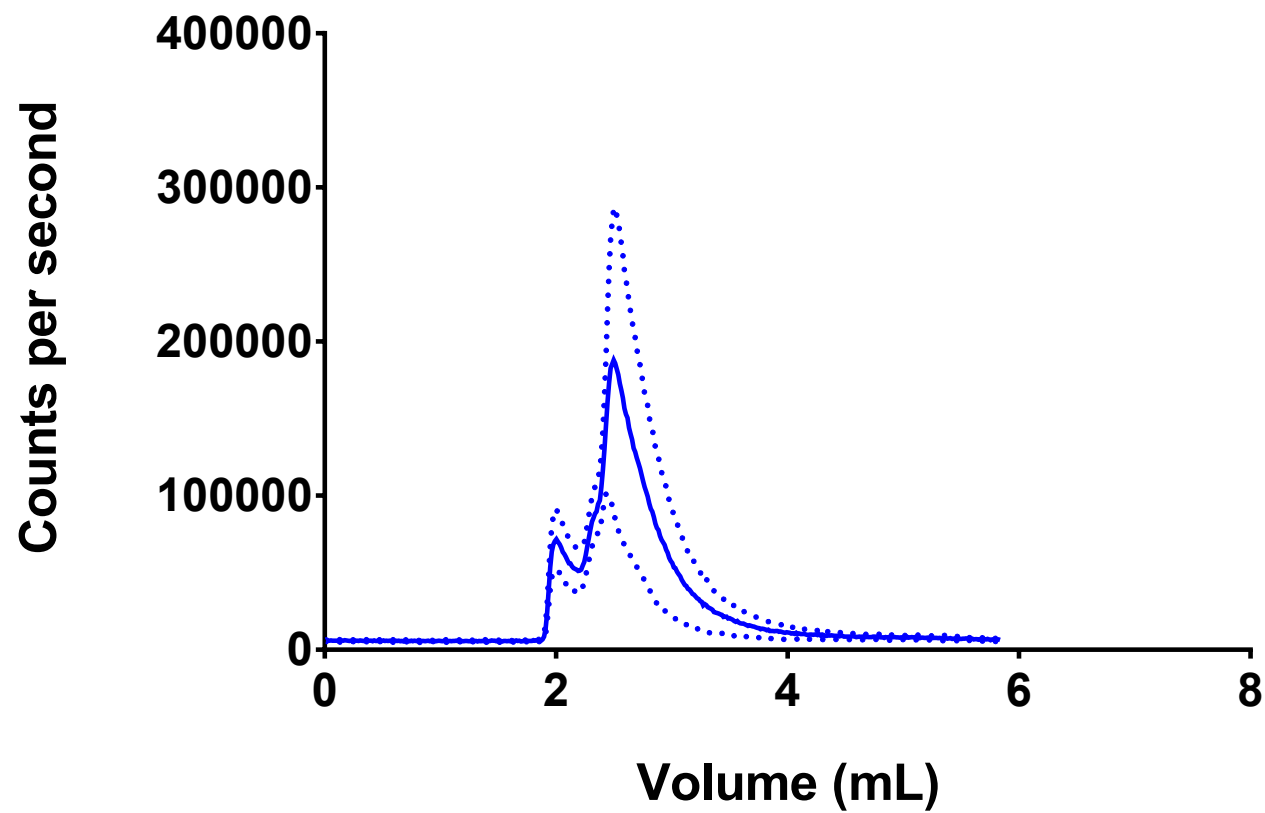

**Co**

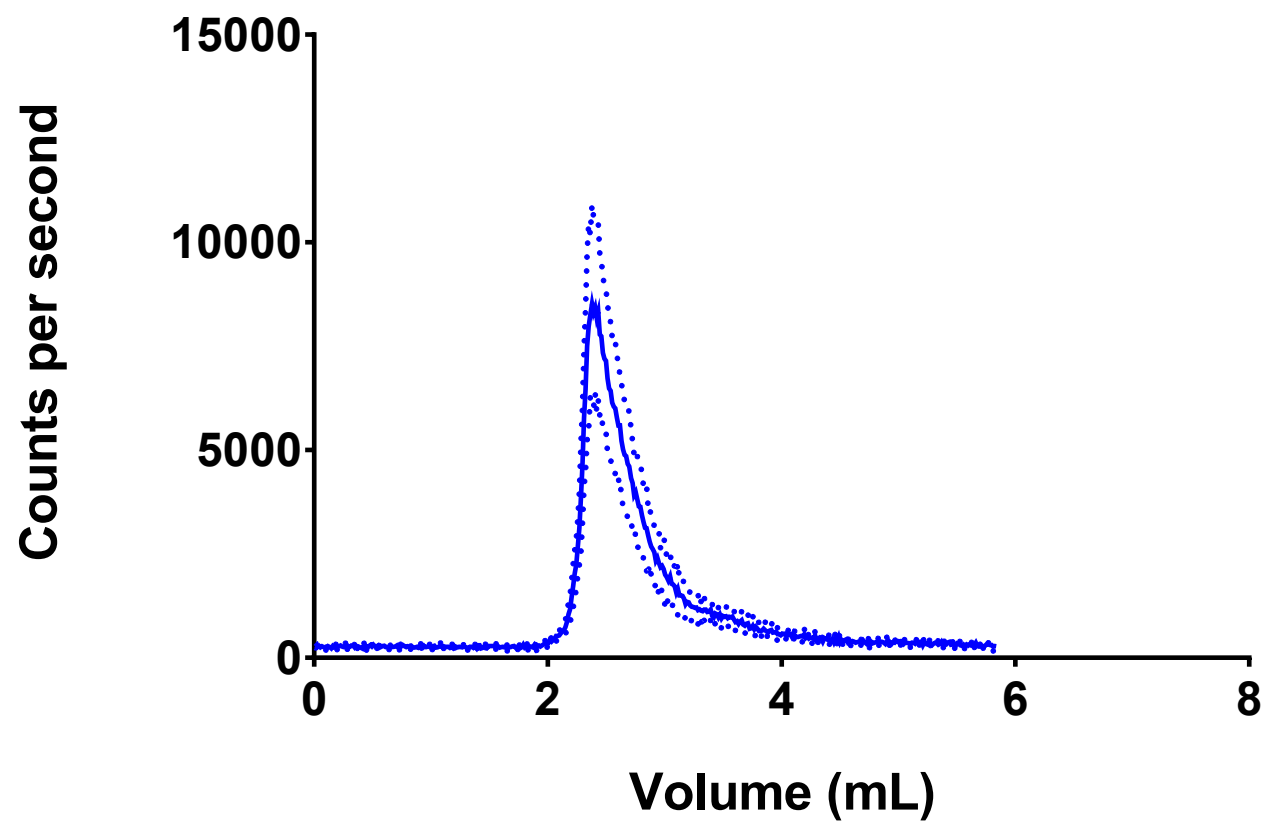

**Ni**

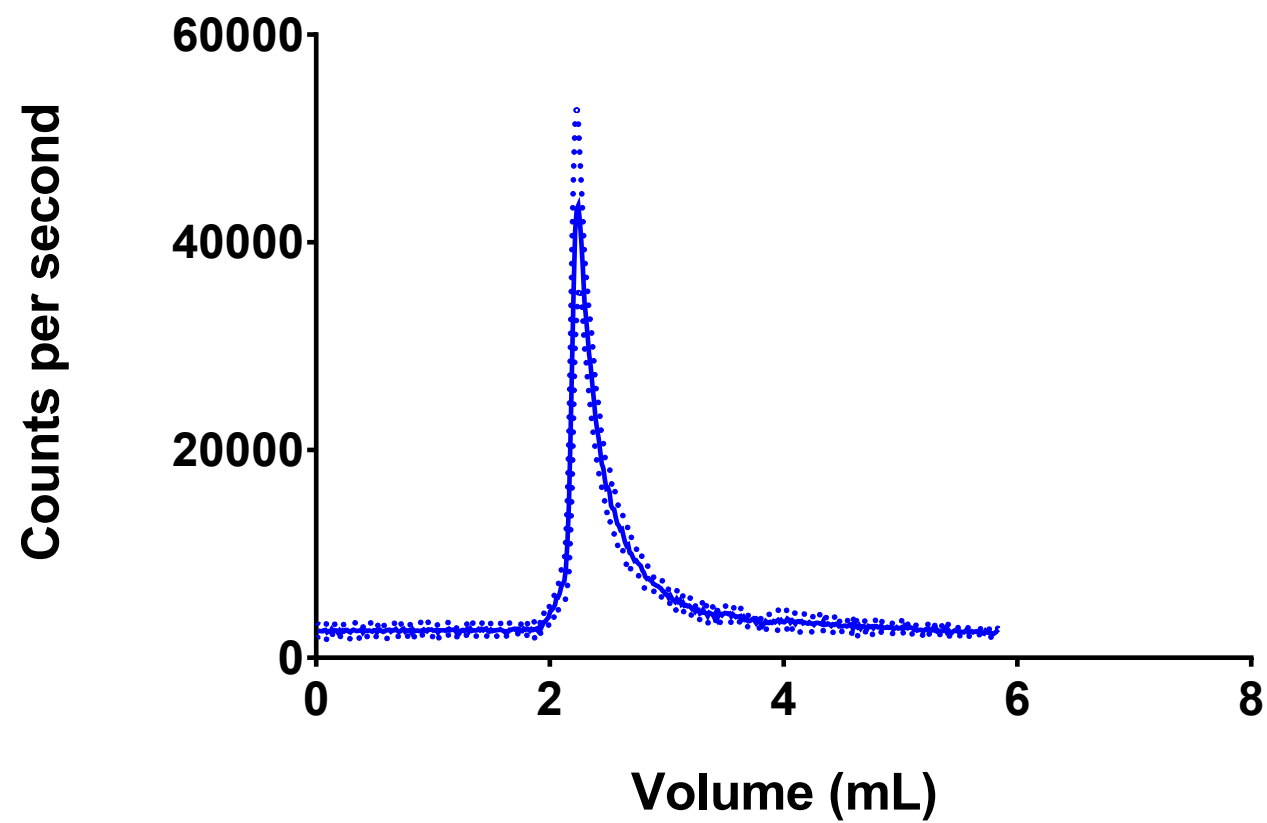

**Cu**

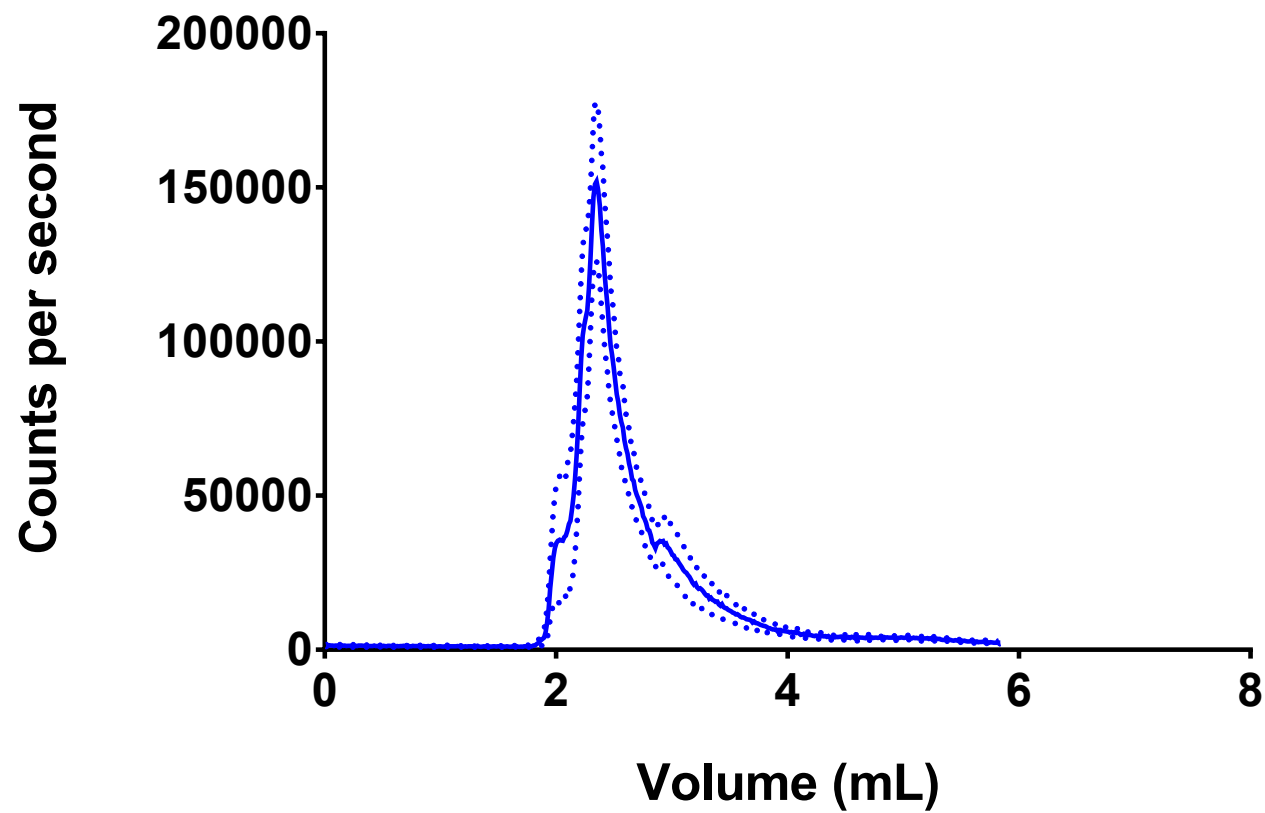

Zn

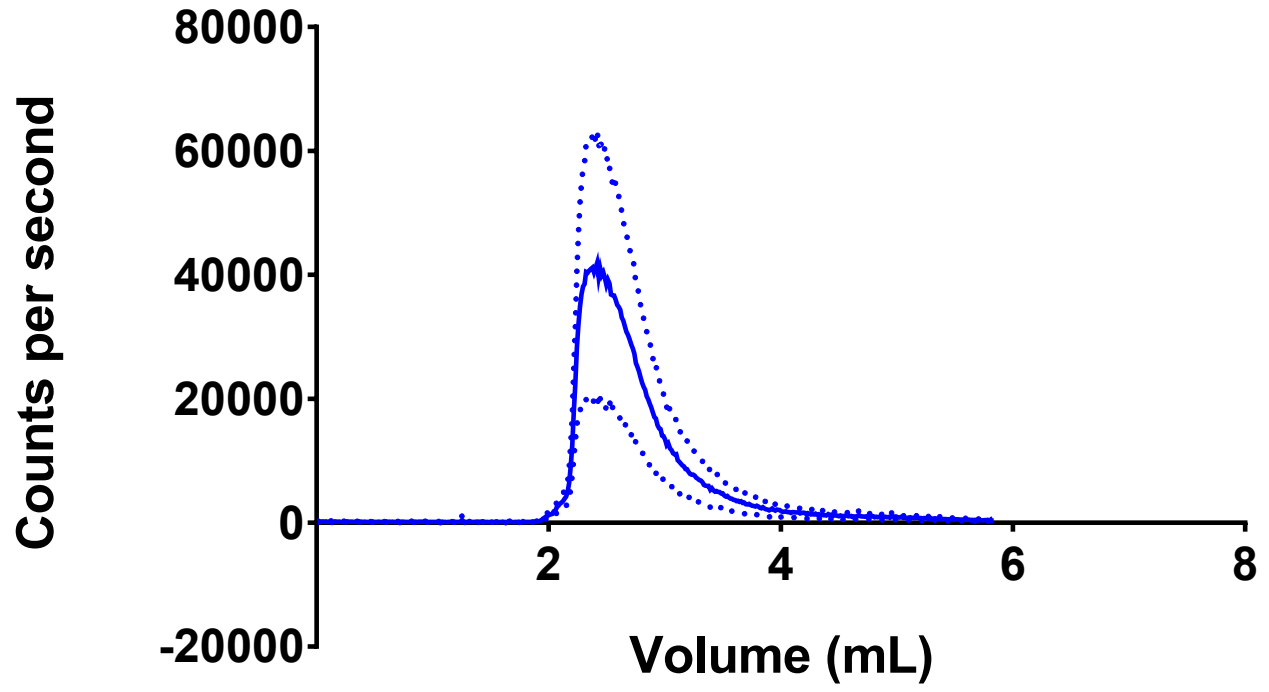

**As**

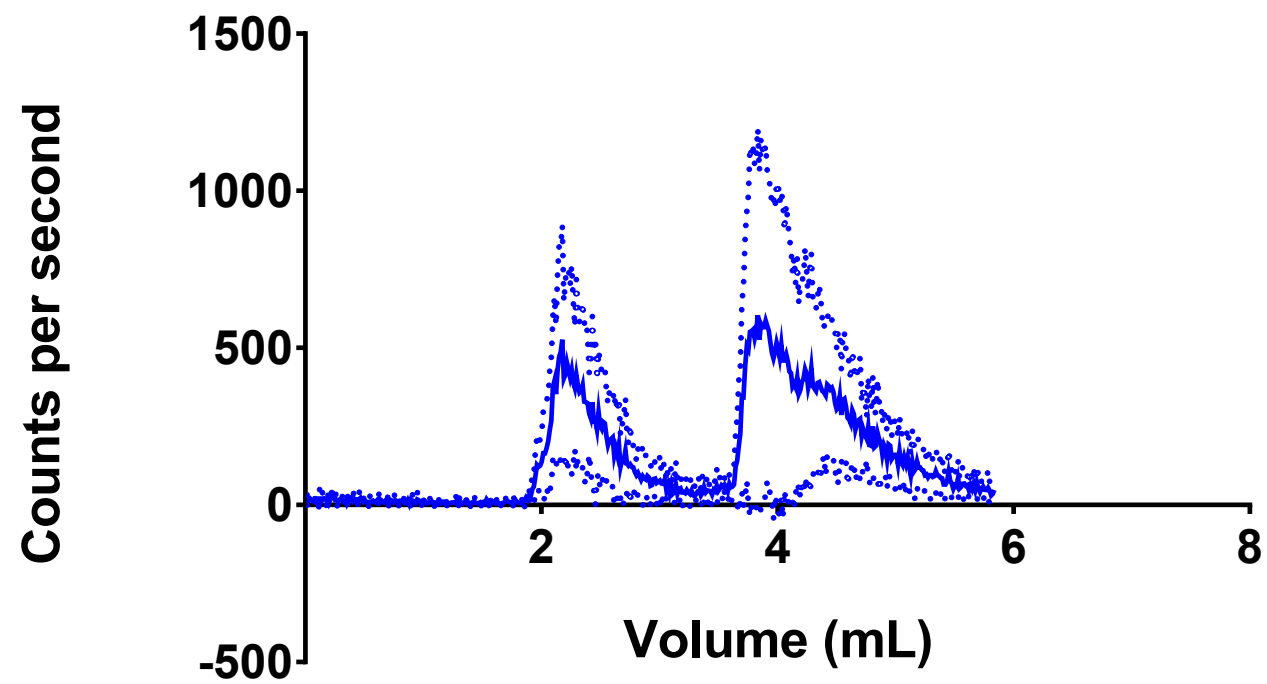

**Rb**

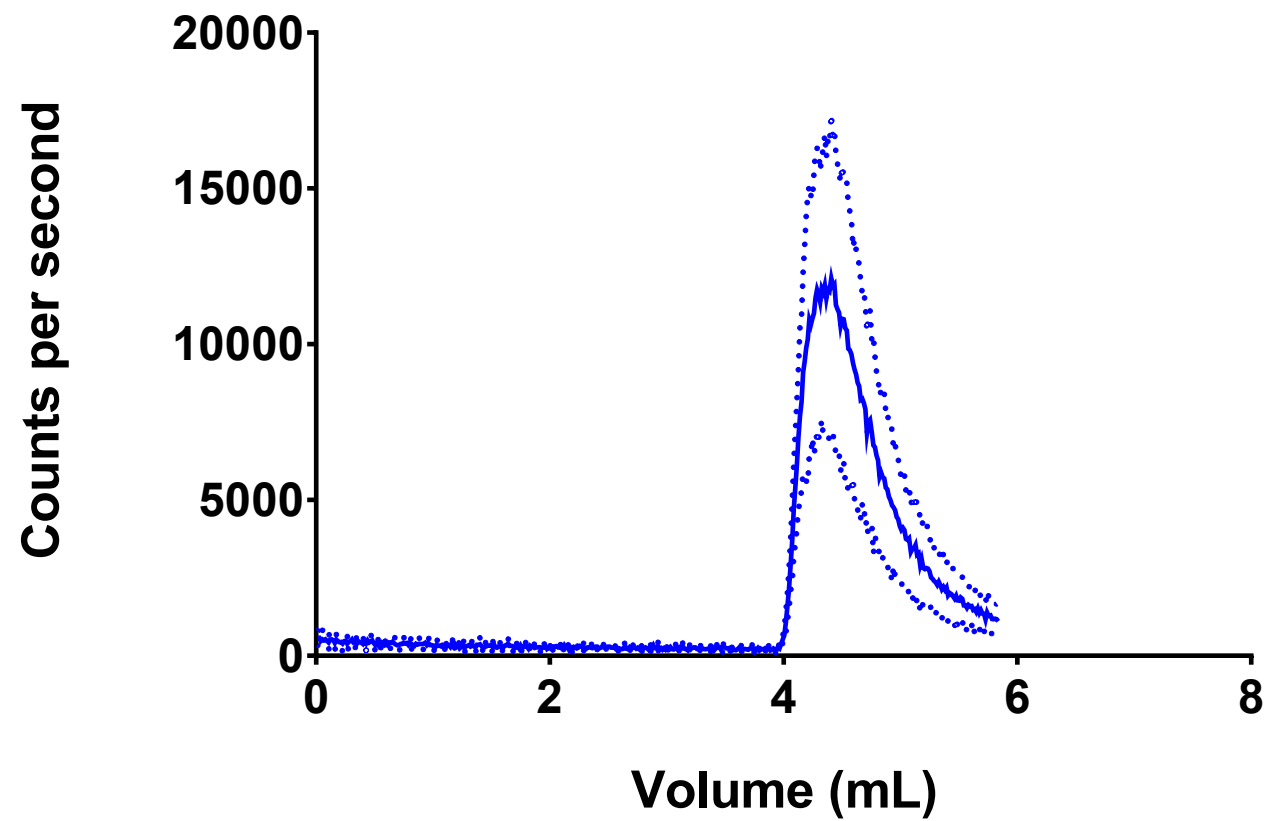



**Sr**

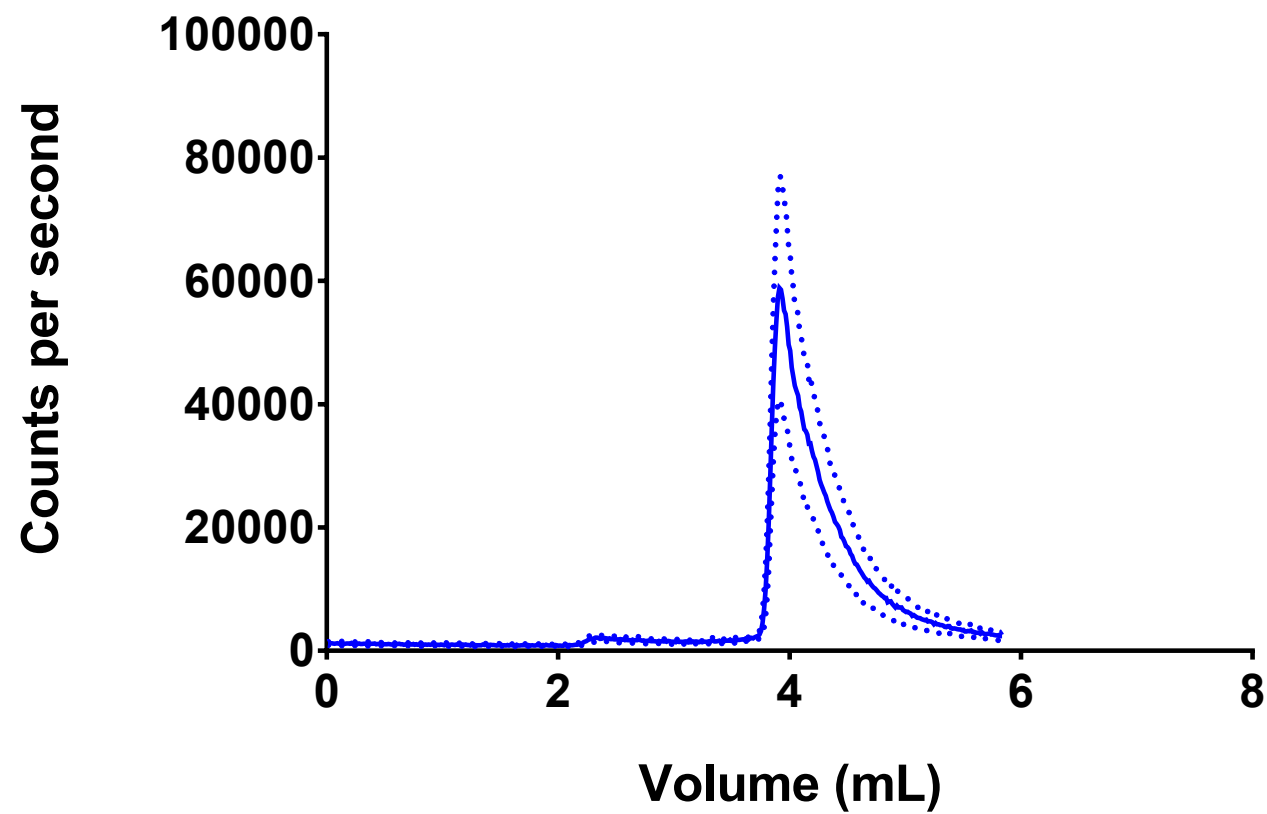

**Mo**

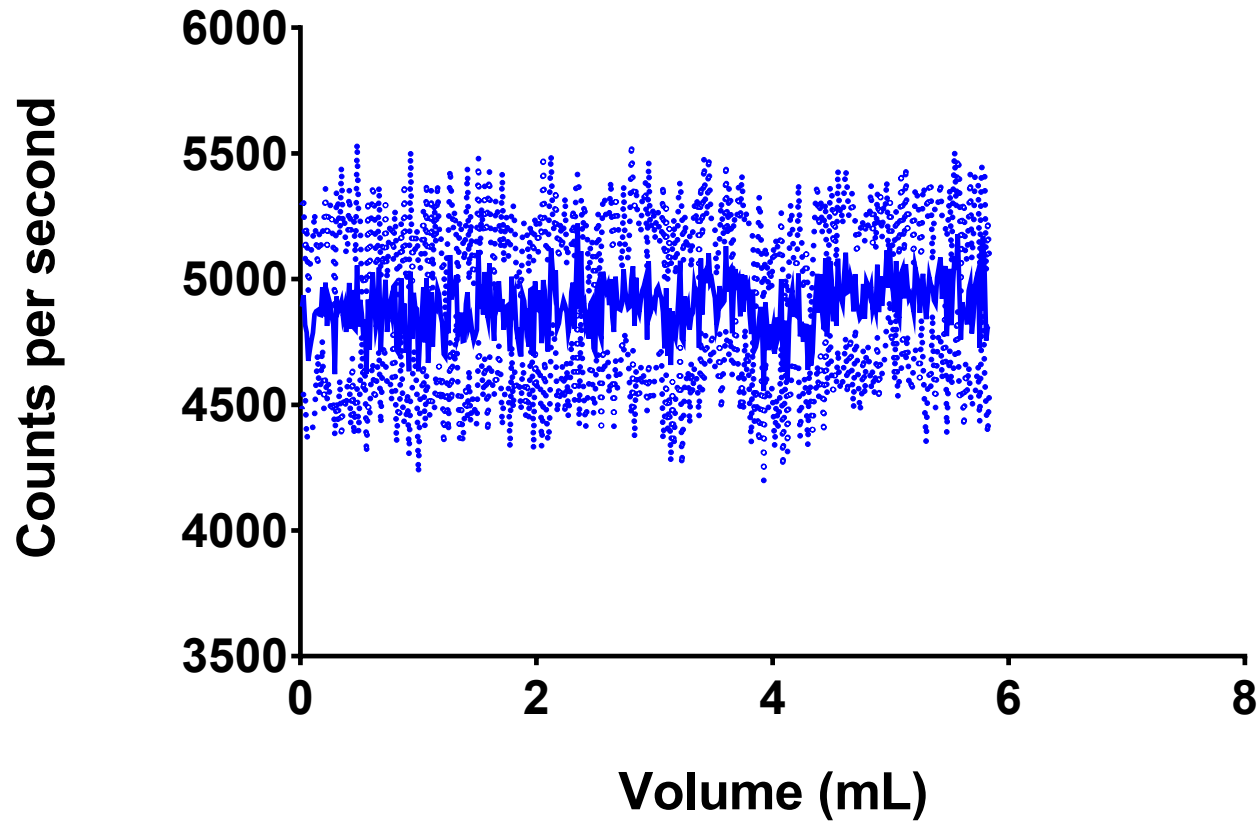

**Cd**

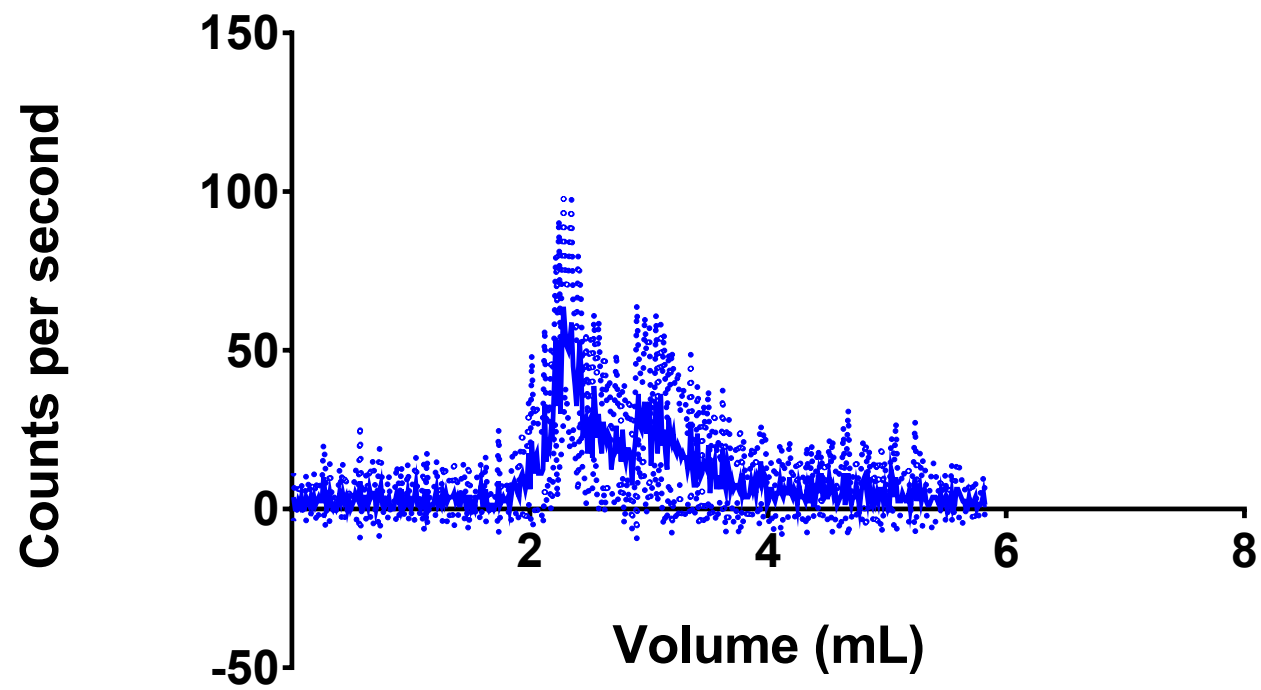

**Sn**

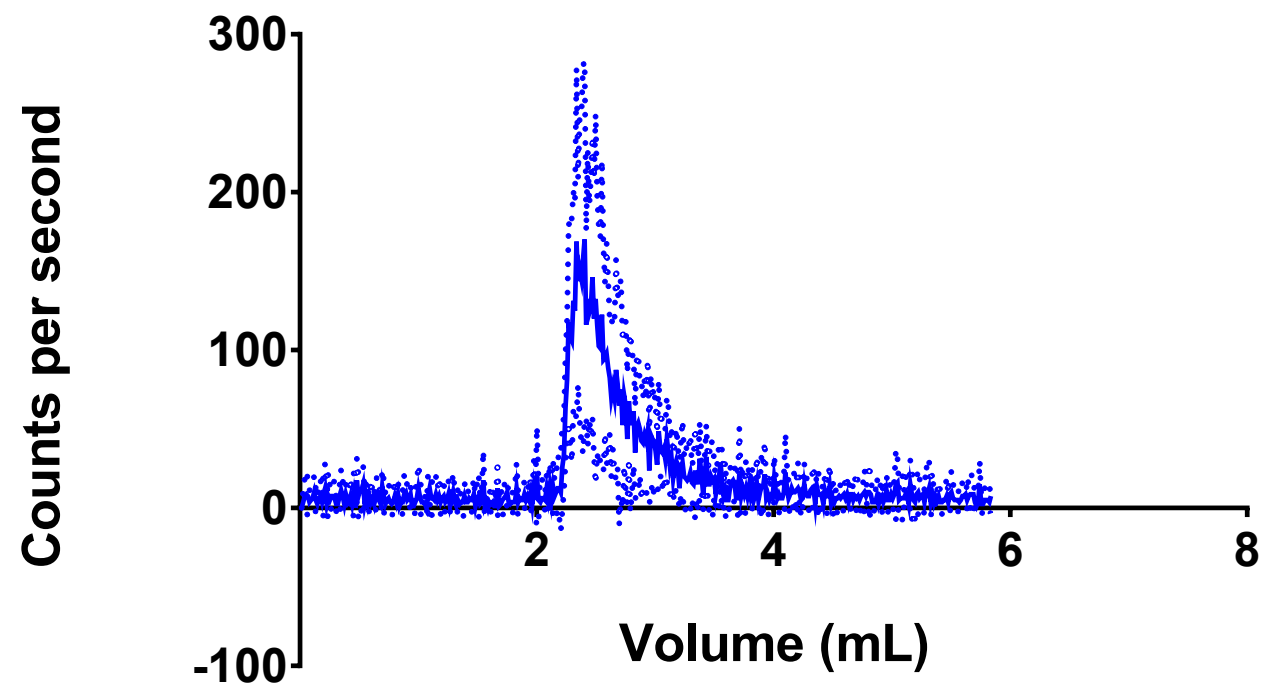

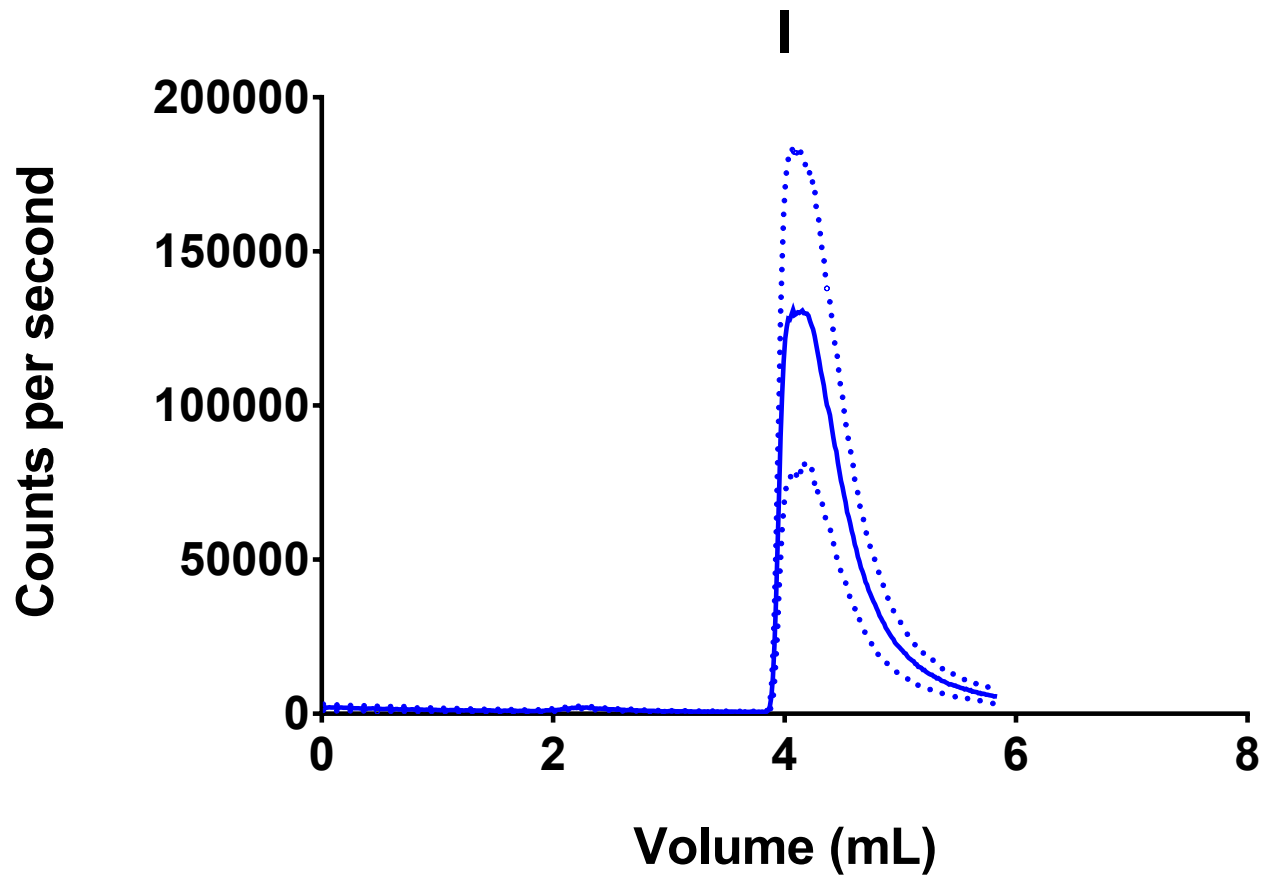

**Ba**

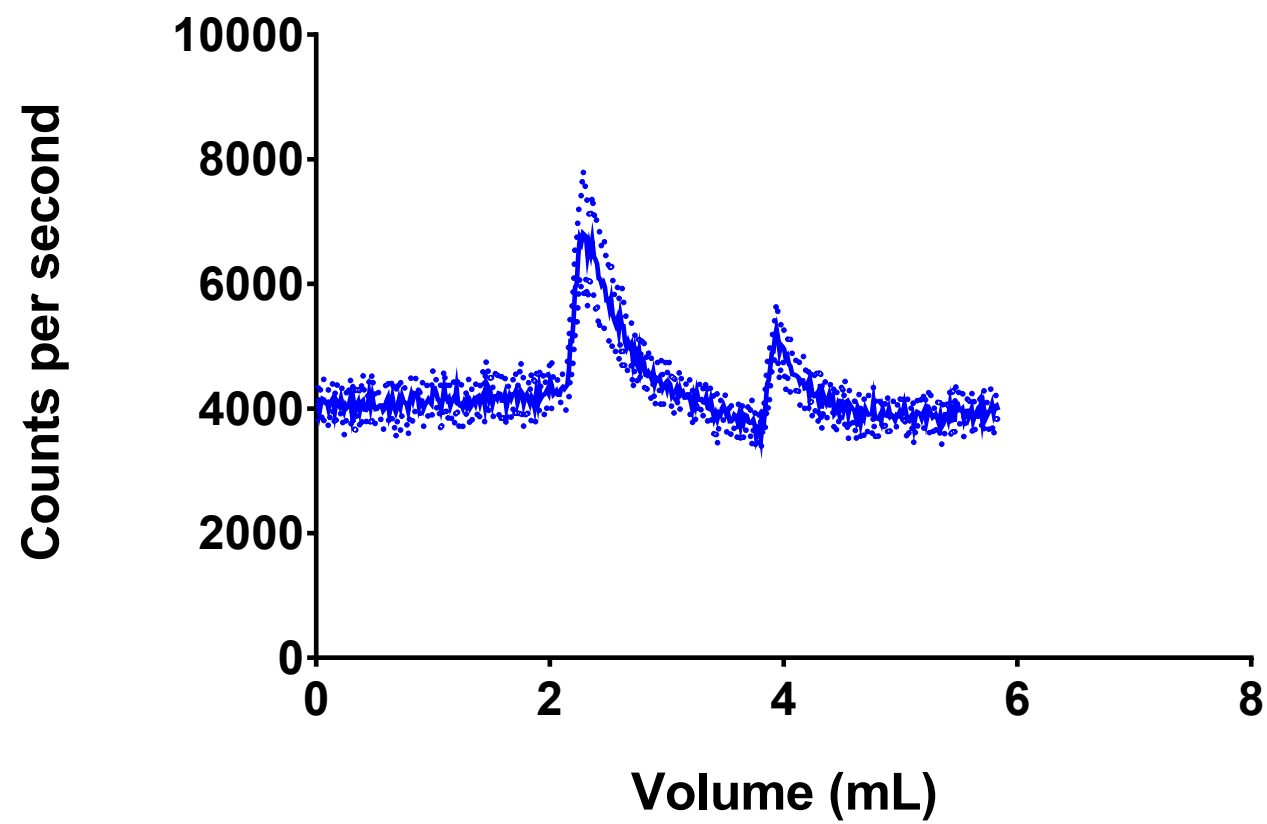

Hg

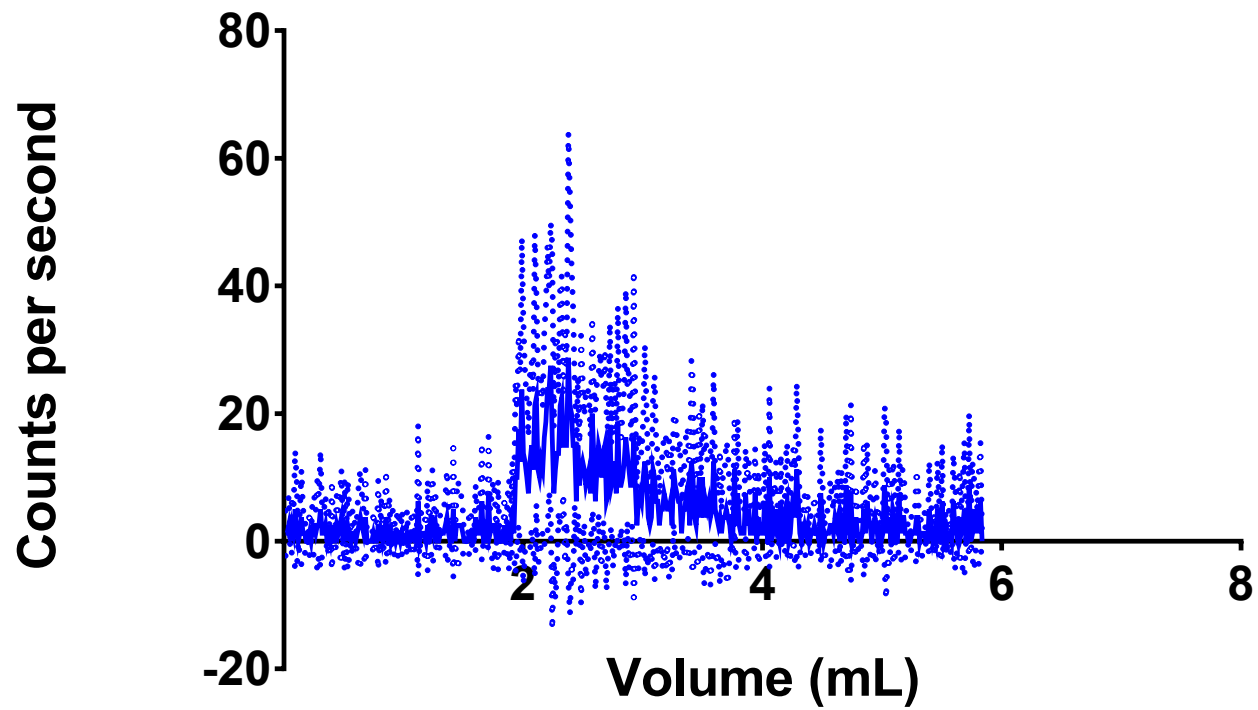

**Pb**

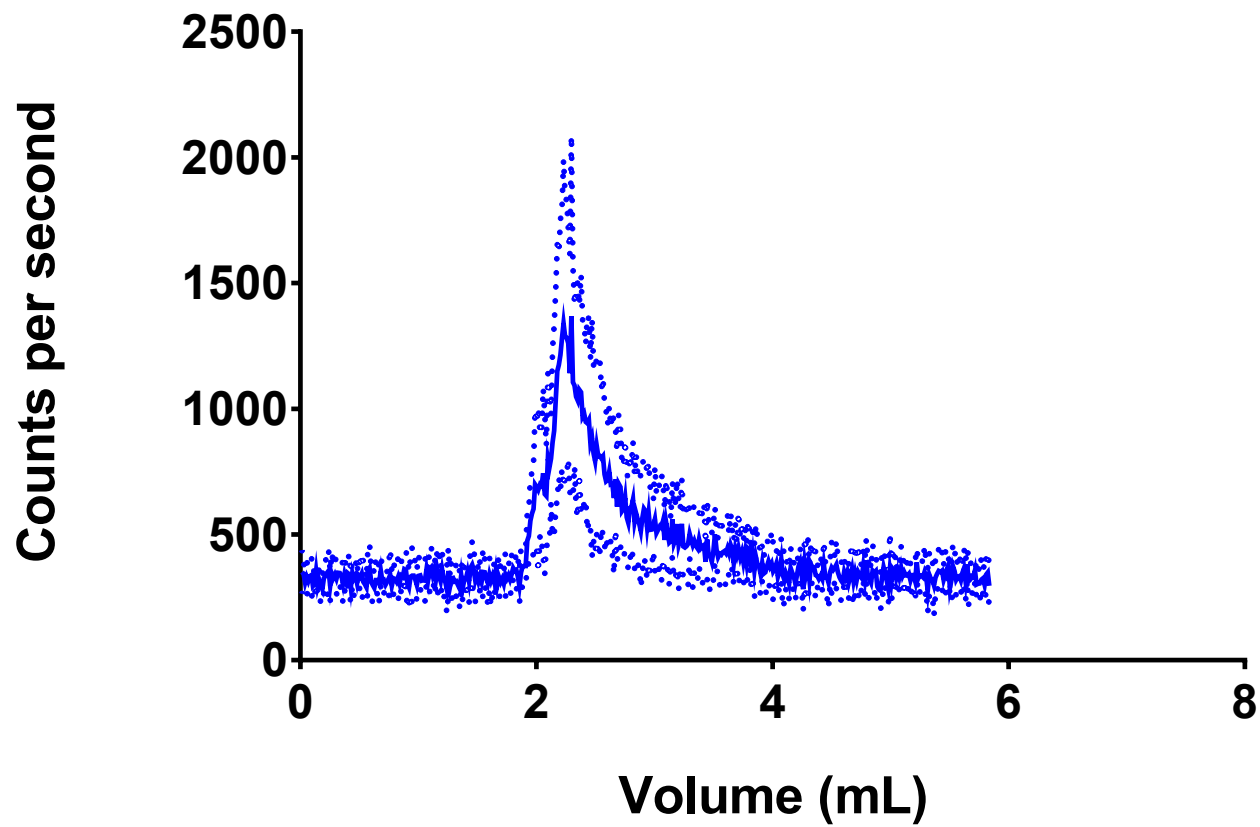

Supplement: c6mt00189k1.pdf [file c6mt00189k1.pdf]
